# Supplementary material for: Validation of a novel semi-automated ECG quantification tool, applied to a cardio-oncology setting Semi-Automated ECG Tool applied to cardio-oncology
Source: Research Square preprint supplement (doi:10.21203/rs.3.rs-7204236/v1), 2025-08-19
Supplement: Supplementary file 1 [file 118aa4e48474c57e8fe30789.docx]

**Table S1.**

**Fixed Effects of ECG parameters in Breast Cancer Patients Treated with Ribociclib.** *The TCM was compared with the TAM, and Reader B was compared with Reader A. "Readings" refers to the comparison between TCM reading#1 and #2. For the intercept, the reference day is D0.*

| **Covariable** | **HR (bpm)** | **PR (ms)** | **QRS (ms)** | **QTc (ms)** | **Soko V5 (µV)** | **Soko V6 (µV)** |
| --- | --- | --- | --- | --- | --- | --- |
| **Intercept** | 76.22 ± 10.07 *** | 115.56 ± 27.33 *** | 48.02 ± 20.67 * | 399.26 ± 21.55 *** | 2502.07 ± 669.14 ** | 2387.84 ± 637.11 ** |
| **D14±3** | -3.02 ± 0.53 *** | -1.02 ± 1.09 (ns) | -1.54 ± 0.47 ** | 15.65 ± 1.37 *** | 46.75 ± 18.40 * | 40.39 ± 18.53 * |
| **D28 ±3** | 0.32 ± 0.53 (ns) | 3.02 ± 1.09 ** | -0.69 ± 0.47 (ns) | -6.19 ± 1.37 *** | 48.43 ± 18.40 ** | 17.10 ± 18.53 (ns) |
| **TCM** | -0.02 ± 0.61 (ns) | -0.06 ± 1.25 (ns) | 0.12 ± 0.54 (ns) | 1.51 ± 1.58 (ns) | -6.69 ± 21.24 (ns) | -5.70 ± 21.40 (ns) |
| **Reader B** | 0.00 ± 0.61 (ns) | -0.54 ± 1.25 (ns) | -0.94 ± 0.54 (ns) | -0.30 ± 1.58 (ns) | -0.05 ± 21.24 (ns) | -0.05 ± 21.40 (ns) |
| **Reading #2** | 0.00 ± 0.61 (ns) | 0.63 ± 1.25 (ns) | 1.05 ± 0.54 (ns) | 0.16 ± 1.58 (ns) | 0.05 ± 21.24 (ns) | 0.05 ± 21.40 (ns) |
| **Age** | -0.13 ± 0.16 (ns) | 0.72 ± 0.43 (ns) | 0.81 ± 0.32 * | 0.39 ± 0.34 (ns) | -12.38 ± 10.50 (ns) | -12.21 ± 10.00 (ns) |

*Soko: Sokolow-Lyon voltage*

**p<0.05, **p<0.01, ***p<0.001, ns = non-significant*, *SD = standard deviation*
