# Supplementary material for: Validation of a novel semi-automated ECG quantification tool, applied to a cardio-oncology setting Semi-Automated ECG Tool applied to cardio-oncology
Source: Research Square preprint supplement (doi:10.21203/rs.3.rs-7204236/v1), 2025-08-19
Supplement: Supplementary file 2 [file ce3efa18a2d06c9b8f05e1b0.docx]

**Table S2.**

**Fixed Effects of ECG parameters in severe ICI myocarditis patients.** *The TCM was compared to the TAM, and Reader B was compared to Reader A. "Readings" refers to the comparison between TCM reading#1 and #2. For the intercept, the reference day is D0.*

| **Covariable** | **HR (bpm)** | **PR (ms)** | **QRS (ms)** | **QTc (ms)** | **Soko V5 (µV)** | **Soko V6 (µV)** |
| --- | --- | --- | --- | --- | --- | --- |
| **Intercept** | 131.80 ± 3.83 * | 108.27 ± 59.22 (ns) | -45.18 ± 104.62 (ns) | 425.34 ± 104.11 ** | 5302.06 ± 2290.60 (ns) | 5348.21 ± 1764.45 * |
| **D5 +/-3** | -11.03 ± 2.40 *** | 1.94 ± 1.71 (ns) | 6.18 ± 1.06 *** | 1.62 ± 2.62 (ns) | 249.71 ± 47.65 *** | 274.96 ± 46.39 *** |
| **D14 +/-3** | -4.28 ± 2.40 (ns) | -6.10 ± 1.71 *** | 5.43 ± 1.06 *** | -8.12 ± 2.62 ** | 441.52 ± 47.65 *** | 372.01 ± 46.39 *** |
| **D21 +/-3** | -8.14 ± 2.40 *** | -4.09 ± 1.71 * | 3.38 ± 1.06 ** | -12.95 ± 2.62 *** | 371.62 ± 47.65 *** | 338.04 ± 46.39 *** |
| **D28 +/-4** | -6.34 ± 2.47 * | -2.28 ± 1.77 (ns) | 0.16 ± 1.10 (ns) | -26.12 ± 2.71 *** | 457.73 ± 49.14 *** | 384.29 ± 47.84 *** |
| **D40 +/-4** | -5.28 ± 2.40 * | -5.62 ± 1.71 ** | -0.27 ± 1.06 (ns) | -21.10 ± 2.62 *** | 348.08 ± 47.65 *** | 384.59 ± 46.39 *** |
| **D50 +/-4** | -10.71 ± 2.40 *** | -5.64 ± 1.71 ** | 0.88 ± 1.06 (ns) | -10.15 ± 2.62 *** | 393.98 ± 47.65 *** | 357.27 ± 46.39 *** |
| **D60 +/-5** | -12.14 ± 2.56 *** | -2.27 ± 1.83 (ns) | -0.73 ± 1.14 (ns) | -9.79 ± 2.80 *** | 436.77 ± 50.94 *** | 328.01 ± 49.60 *** |
| **TCM** | 0.16 ± 1.73 (ns) | -0.91 ± 1.24 (ns) | -0.54 ± 0.77 (ns) | 0.89 ± 1.89 (ns) | -13.34 ± 34.34 (ns) | -13.71 ± 33.44 (ns) |
| **Reader B** | 0.00 ± 1.73 (ns) | -0.42 ± 1.24 (ns) | -1.19 ± 0.77 (ns) | 0.43 ± 1.89 (ns) | -0.69 ± 34.34 (ns) | -0.73 ± 33.44 (ns) |
| **Reading #2** | 0.00 ± 1.73 (ns) | 0.60 ± 1.24 (ns) | 1.27 ± 0.77 (ns) | 0.21 ± 1.89 (ns) | 0.48 ± 34.34 (ns) | 0.31 ± 33.44 (ns) |
| **Age** | -0.67 ± 0.48 (ns) | 0.63 ± 0.74 (ns) | 1.97 ± 1.30 (ns) | 0.12 ± 1.29 (ns) | -58.39 ± 28.48 (ns) | -58.91 ± 21.94 * |
| **Sex (Male)** | -5.38 ± 8.31 (ns) | 3.94 ± 12.86 (ns) | 11.36 ± 22.73 (ns) | -7.45 ± 22.61 (ns) | 392.66 ± 497.54 (ns) | 256.59 ± 383.20 (ns) |

*Soko: Sokolow-Lyon voltage*

**p<0.05, **p<0.01, ***p<0.001, ns = non-significant, SD = standard deviation*
